# Supplementary material for: The response of cucumber plants (Cucumis sativus L.) to the application of PCB-contaminated sewage sludge and urban sediment
Source: PeerJ. 2019 May 1;7:e6743. doi: 10.7717/peerj.6743 (PMC6500380; doi:10.7717/peerj.6743)
Supplement: Data S1 [file peerj-07-6743-s001.xls]

## Sheet: Arkusz1
Protein
		C	1.8	5.4	10.8
Sewage sludge (SS)		4.301	4.951	5.041	6.788
		5.329	5.456	6.037	6.498
		4.688	6.425	6.952	6.058
		5.114	5.588	5.638	6.044
		4.204	5.277	5.843	6.084
		4.08	6.262	5.574	6.749
		4.94	5.236	7.408	6.806
		5.283	5.132
	n	8	8	7	7
	av	4.74238	5.54087	6.07043	6.43243
	SD	0.499	0.533	0.828	0.361
		C	1.8	5.4	10.8
Urban Sediments (SED)		4.018	4.005	4.825	5.388
		5.387	4.451	5.104	6.392
		4.979	4.499	5.204	4.301
		5.468	5.331	5.922	6.349
		5.466	4.912	3.941	5.311
		4.462	3.534	5.186	6.019
		5.698		4.309	5.34
	n	7	6	7	7
	av	5.06829	4.45533	4.92729	5.58571
	SD	0.619	0.637	0.649	0.736
APx
		C	1.8	5.4	10.8
Sewage sludge (SS)		1.337	0.64	0.672	0.742
		1.675	0.6705	0.657	0.903
		1.573	0.7275	0.848	0.113
		1.268	0.55	0.593	0.08
		1.523	0.622	0.448	0.687
		1.057	0.585	0.885	1.112
			0.971	0.717	0.936
	n	6	7	7	7
	av	1.4055	0.680857	0.688571	0.653286
	SD	0.228	0.14	0.149	0.405
		C	1.8	5.4	10.8
Urban Sediments (SED)		1.245	1.507	0.989	0.574
		1.015	1.238	0.976	0.786
		1.238	1.452	0.558	0.768
		1.342	0.765	0.593	0.739
		1.004	0.498	0.996	0.587
		1.239	0.488	0.526	0.445
	n	6	6	6	6
	av	1.1805	0.991333	0.773	0.649833
	SD	0.138	0.466	0.236	0.136
CAT
		C	1.8	5.4	10.8
Sewage sludge (SS)		0.38	0.392	0.453	0.459
		0.395	0.397	0.492	0.43
		0.394	0.323	0.471	0.424
		0.333	0.32	0.41	0.46
		0.391	0.385	0.393	0.417
		0.372	0.347	0.404	0.464
			0.355
			0.398
	n	6	8	6	6
	av	0.3775	0.364625	0.437167	0.442333
	SD	0.024	0.033	0.041	0.021
		C	1.8	5.4	10.8
Urban Sediments (SED)		0.296	0.306	0.302	0.36
		0.352	0.303	0.301	0.349
		0.324	0.298	0.324	0.357
		0.36	0.301	0.348	0.313
		0.337	0.327	0.303	0.312
		0.316	0.321	0.324	0.274
				0.314	0.355
	n	6	6	7	7
	av	0.330833	0.309333	0.316571	0.331429
	SD	0.024	0.012	0.017	0.033
TBARS
		C	1.8	5.4	10.8
Sewage sludge (SS)		1.857	1.85	2.187	2.335
		2.08	2.67	2.28	1.839
		2.069	3.991	3.701	1.852
		2.53	1.892	2.058	1.831
		1.548	2.568	3.198	2.038
		1.886	3.7	2.329	2.288
		2.182	2.012	3.011
		2.506	3.086
	n	8	8	7	6
	av	2.08225	2.72112	2.68057	2.0305
	SD	0.331	0.817	0.624	0.231
		C	1.8	5.4	10.8
Urban Sediments (SED)		2.221	1.985	2.985	1.726
		2.214	1.535	2.958	3.793
		2.46	1.541	3.251	2.757
		2.218	2.43	1.936	2.133
		2.228	1.457	1.751	1.973
		2.42	2.314	2.846	1.874
					1.677
	n	6	6	6	7
	av	2.2935	1.877	2.62117	2.27614
	SD	0.114	0.427	0.62	0.76
Chlorophyll
		C	1.8	5.4	10.8
Sewage sludge (SS)		2.278	2.5	2.24	2.333
		2.559	2.401	2.195	2.923
		2.167	2.417	2.344	2.533
		2.066	2.114	2.703	2.848
		2.641	2.786	2.968	2.562
		2.236	2.871	2.488	2.458
		2.611	2.375	3.429	2.932
			2.543
	n	7	8	7	7
	av	2.36543	2.50087	2.62386	2.65557
	SD	0.233	0.24	0.447	0.242
		C	1.8	5.4	10.8
Urban Sediments (SED)		2.124	2.38	2.185	2.131
		2.011	2.573	2.424	3.126
		3.038	2.485	2.269	2.285
		2.008	2.395	2.219	2.412
		2.638	2.608	2.456	2.261
		2.984	2.395	2.202	2.988
			2.558	2.447	2.237
	n	6	7	7	7
	av	2.46717	2.48486	2.31457	2.49143
	SD	0.481	0.096	0.123	0.397
Chlorophyll a/b
		C	1.8	5.4	10.8
Sewage sludge (SS)		2.14	2.119	2.087	2.224
		2.063	2.077	2.111	2.098
		2.003	2.082	2.06	2.138
		2.134	2.062	2.117	2.128
		2.145	2.052	2.028	2.3
		2.015	2.098	2.046	2.316
	n	6	6	6	6
	av	2.08333	2.08167	2.07483	2.20067
	SD	0.065	0.024	0.036	0.093
		C	1.8	5.4	10.8
Urban Sediments (SED)		2.052	2.086	2.116	2.09
		2.011	2.076	2.034	2.047
		2.023	2.063	2.068	2.021
		2.011	2.039	2.052	2.159
		2.003	2.051	2.025	2.062
		2.038	2.089	2.028	2.145
				2.1
	n	6	6	7	6
	av	2.023	2.06733	2.06043	2.08733
	SD	0.019	0.02	0.036	0.055
PCB concentration in soil Sewage Sludge
Before plant growth		C	1.8	5.4	10.8
Sewage sludge (SS)		0.484	0.961	1.113	1.012
		0.54	0.919	1.127	1.295
	n	2	2	2	2
	av	0.512	0.94	1.12	1.154
	SD	0.04	0.03	0.01	0.2
Before plant growth		C	1.8	5.4	10.8
Sewage sludge (SS)		0.275	0.849	0.661	0.835
		0.685	0.255	0.718	0.637
	n	2	2	2	2
	av	0.48	0.552	0.69	0.736
	SD	0.29	0.42	0.04	0.14
PCB concentration in soil Urban Sediment
Before plant growth		C	1.8	5.4	10.8
Urban Sediments (SED)		0.501	0.735	0.953	1.141
		0.515	0.881	0.966	1.099
	n	2	2	2	2
	av	0.508	0.808	0.96	1.12
	SD	0.01	0.1	0.09	0.03
After plant growth		C	1.8	5.4	10.8
Urban Sediments (SED)		0.475	0.413	0.551	0.793
		0.461	0.795	0.848	0.779
	n	2	2	2	2
	av	0.468	0.604	0.7	0.786
	SD	0.01	0.27	0.21	0.01
